# Supplementary material
Source: publisher figshare collection journal article supplement (https://acs.figshare.com/ndownloader/files/3861163)
Supplement: Supplementary file 1 [file 3861163]

data_3a

_publ_requested_journal          'Inorg.Chem.'
_publ_contact_author_name        'Dr. Pierre Braunstein'
_publ_contact_author_address     
;Laboratoire de Chimie de Coordination
UMR 7177 CNRS
Universit\'e de Strasbourg
Institut Le Bel - 4 rue Blaise Pascal, 
CS 90032, F-67081 STRASBOURG cedex
France
;
_publ_contact_author_email       braunstein@unistra.fr
_publ_contact_author_phone       '+33 (0)3 68 85 13 08'
_publ_contact_author_fax         '+33 (0)3 68 85 13 22'
loop_
_publ_author_name
_publ_author_address
'Braunstein, Pierre'
;Laboratoire de Chimie de Coordination
UMR 7177 CNRS
Universit\'e de Strasbourg
Institut Le Bel - 4 rue Blaise Pascal, 
CS 90032, F-67081 STRASBOURG cedex
France
;
'Zhang, Shuanming'
;Laboratoire de Chimie de Coordination
UMR 7177 CNRS
Universit\'e de Strasbourg
Institut Le Bel - 4 rue Blaise Pascal, 
CS 90032, F-67081 STRASBOURG cedex
France
;
'Pattacini, Roberto'
;Laboratoire de Chimie de Coordination
UMR 7177 CNRS
Universit\'e de Strasbourg
Institut Le Bel - 4 rue Blaise Pascal, 
CS 90032, F-67081 STRASBOURG cedex
France
;
'De Cola, Luisa'
;
Laboratoire de Chimie et des 
Biomat\'eriaux Supramol\'eculaires 
ISIS 8 all\'ee Gaspard Monge 
BP 70028 F-67083 Strasbourg Cedex
;
'Plummer Edward'
;
;
'Mauro, Matteo'
;
Laboratoire de Chimie et des 
Biomat\'eriaux Supramol\'eculaires 
ISIS 8 all\'ee Gaspard Monge 
BP 70028 F-67083 Strasbourg Cedex
;
'Gourlaouen, Christophe'
;
Laboratoire de Chimie Quantique, 
Institut de Chimie 
(UMR 7177 - CNRS/UdS), 
Universit\'e de Strasbourg, 
1 Rue Blaise Pascal BP 296/R8, 
F-67008 Strasbourg Cedex- France 
;
'Daniel, Chantal'
;
Laboratoire de Chimie Quantique, 
Institut de Chimie 
(UMR 7177 - CNRS/UdS), 
Universit\'e de Strasbourg, 
1 Rue Blaise Pascal BP 296/R8, 
F-67008 Strasbourg Cedex- France 
;

_audit_creation_method           SHELXL-97
_chemical_name_systematic        ?
_chemical_name_common            ?
_chemical_formula_moiety         'C56 H50 N2 O2 P4 Pt, 2(B F4)'
_chemical_formula_sum            'C56 H50 B2 F8 N2 O2 P4 Pt'
_chemical_melting_point          ?

_exptl_crystal_description       plate
_exptl_crystal_colour            colorless

_diffrn_ambient_temperature      173(2)
_chemical_formula_weight         1275.57

loop_
_atom_type_symbol
_atom_type_description
_atom_type_scat_dispersion_real
_atom_type_scat_dispersion_imag
_atom_type_scat_source
Pt Pt -1.7033 8.3905 'International Tables Vol C Tables 4.2.6.8 and 6.1.1.4'
P P 0.1023 0.0942 'International Tables Vol C Tables 4.2.6.8 and 6.1.1.4'
C C 0.0033 0.0016 'International Tables Vol C Tables 4.2.6.8 and 6.1.1.4'
N N 0.0061 0.0033 'International Tables Vol C Tables 4.2.6.8 and 6.1.1.4'
O O 0.0106 0.0060 'International Tables Vol C Tables 4.2.6.8 and 6.1.1.4'
B B 0.0013 0.0007 'International Tables Vol C Tables 4.2.6.8 and 6.1.1.4'
F F 0.0171 0.0103 'International Tables Vol C Tables 4.2.6.8 and 6.1.1.4'
H H 0.0000 0.0000 'International Tables Vol C Tables 4.2.6.8 and 6.1.1.4'

_symmetry_cell_setting           monoclinic
_symmetry_space_group_name_H-M   'P 21/c'
_symmetry_int_tables_number      14
_chemical_absolute_configuration ?

loop_
_symmetry_equiv_pos_as_xyz
'x, y, z'
'-x, y+1/2, -z+1/2'
'-x, -y, -z'
'x, -y-1/2, z-1/2'

_cell_length_a                   9.3583(3)
_cell_length_b                   22.5243(8)
_cell_length_c                   12.3493(2)
_cell_angle_alpha                90.00
_cell_angle_beta                 91.462(2)
_cell_angle_gamma                90.00
_cell_volume                     2602.25(13)
_cell_formula_units_Z            2
_cell_measurement_temperature    173(2)
_cell_measurement_reflns_used    15749
_cell_measurement_theta_min      0.998
_cell_measurement_theta_max      27.878
_exptl_crystal_size_max          0.1
_exptl_crystal_size_mid          0.1
_exptl_crystal_size_min          0.06
_exptl_crystal_density_meas      ?
_exptl_crystal_density_diffrn    1.628
_exptl_crystal_density_method    'not measured'
_exptl_crystal_F_000             1272
_exptl_absorpt_coefficient_mu    2.893
_exptl_absorpt_correction_type   multi-scan
_exptl_absorpt_correction_T_min  0.732
_exptl_absorpt_correction_T_max  0.846


_exptl_absorpt_process_details   
;
[c.f. r.h. blessing, acta cryst. (1995), a51, 33-38]
;
_diffrn_radiation_probe          x-ray
_diffrn_radiation_type           MoK\a
_diffrn_radiation_wavelength     0.71073
_diffrn_source                   'fine-focus sealed tube'
_diffrn_radiation_monochromator  graphite
_diffrn_measurement_device_type  KappaCCD
_diffrn_measurement_method       CCD
_diffrn_detector_area_resol_mean 9
_diffrn_standards_number         ?
_diffrn_standards_interval_count ?
_diffrn_standards_interval_time  ?
_diffrn_standards_decay_%        ?
_diffrn_reflns_number            18555
_diffrn_reflns_av_R_equivalents  0.0862
_diffrn_reflns_av_sigmaI/netI    0.0694
_diffrn_reflns_limit_h_min       -12
_diffrn_reflns_limit_h_max       11
_diffrn_reflns_limit_k_min       -27
_diffrn_reflns_limit_k_max       29
_diffrn_reflns_limit_l_min       -16
_diffrn_reflns_limit_l_max       16
_diffrn_reflns_theta_min         2.18
_diffrn_reflns_theta_max         27.87
_reflns_number_total             6166
_reflns_number_gt                4435
_reflns_threshold_expression     >2sigma(I)

_computing_cell_refinement       'HKL Scalepack (Otwinowski & Minor 1997)'
_computing_data_reduction        
'HKL Denzo and Scalepack (Otwinowski & Minor 1997)'
_computing_structure_solution    'SHELXS-97 (Sheldrick, 1997)'
_computing_structure_refinement  'SHELXL-97 (Sheldrick, 1997)'
_computing_molecular_graphics    ORTEP-3
_computing_publication_material  PLATON

_refine_special_details          
; 
 Refinement of F^2^ against ALL reflections.  The weighted R-factor wR and 
 goodness of fit S are based on F^2^, conventional R-factors R are based 
 on F, with F set to zero for negative F^2^. The threshold expression of 
 F^2^ > 2sigma(F^2^) is used only for calculating R-factors(gt) etc. and is 
 not relevant to the choice of reflections for refinement.  R-factors based 
 on F^2^ are statistically about twice as large as those based on F, and R- 
 factors based on ALL data will be even larger. 
;

_refine_ls_structure_factor_coef Fsqd
_refine_ls_matrix_type           full
_refine_ls_weighting_scheme      calc
_refine_ls_weighting_details     
'calc w=1/[\s^2^(Fo^2^)+(0.0461P)^2^+0.0000P] where P=(Fo^2^+2Fc^2^)/3'
_atom_sites_solution_primary     direct
_atom_sites_solution_secondary   difmap
_atom_sites_solution_hydrogens   geom
_refine_ls_hydrogen_treatment    mixed
_refine_ls_extinction_method     none
_refine_ls_extinction_coef       ?
_refine_ls_number_reflns         6166
_refine_ls_number_parameters     344
_refine_ls_number_restraints     0
_refine_ls_R_factor_all          0.0609
_refine_ls_R_factor_gt           0.0356
_refine_ls_wR_factor_ref         0.0918
_refine_ls_wR_factor_gt          0.0818
_refine_ls_goodness_of_fit_ref   0.962
_refine_ls_restrained_S_all      0.962
_refine_ls_shift/su_max          0.000
_refine_ls_shift/su_mean         0.000

loop_
_atom_site_label
_atom_site_type_symbol
_atom_site_fract_x
_atom_site_fract_y
_atom_site_fract_z
_atom_site_U_iso_or_equiv
_atom_site_adp_type
_atom_site_occupancy
_atom_site_symmetry_multiplicity
_atom_site_calc_flag
_atom_site_refinement_flags
_atom_site_disorder_assembly
_atom_site_disorder_group
Pt1 Pt 0.0000 0.0000 1.0000 0.02069(7) Uani 1 2 d S . .
P1 P -0.01723(11) 0.01955(5) 0.81512(7) 0.0219(2) Uani 1 1 d . . .
P2 P 0.10527(10) 0.09190(4) 0.96935(7) 0.0241(2) Uani 1 1 d . . .
C1 C 0.0711(4) 0.08875(15) 0.8285(3) 0.0240(8) Uani 1 1 d . . .
C2 C 0.1305(4) 0.12145(17) 0.7458(3) 0.0279(8) Uani 1 1 d . . .
C3 C 0.1810(5) 0.1448(2) 0.5705(3) 0.0440(11) Uani 1 1 d . . .
H3A H 0.1140 0.1644 0.5184 0.053 Uiso 1 1 calc R . .
H3B H 0.2533 0.1227 0.5296 0.053 Uiso 1 1 calc R . .
C4 C 0.2520(5) 0.19009(19) 0.6440(3) 0.0417(10) Uani 1 1 d . . .
H4A H 0.3570 0.1901 0.6362 0.050 Uiso 1 1 calc R . .
H4B H 0.2145 0.2305 0.6297 0.050 Uiso 1 1 calc R . .
C5 C 0.0811(4) -0.03122(16) 0.7309(3) 0.0230(8) Uani 1 1 d . . .
C6 C 0.1981(4) -0.06096(18) 0.7778(3) 0.0336(9) Uani 1 1 d . . .
H6 H 0.2203 -0.0557 0.8527 0.040 Uiso 1 1 calc R . .
C7 C 0.2818(4) -0.09794(19) 0.7169(3) 0.0368(10) Uani 1 1 d . . .
H7 H 0.3599 -0.1186 0.7501 0.044 Uiso 1 1 calc R . .
C8 C 0.2521(4) -0.10484(19) 0.6083(3) 0.0392(10) Uani 1 1 d . . .
H8 H 0.3113 -0.1294 0.5658 0.047 Uiso 1 1 calc R . .
C9 C 0.1371(5) -0.0764(2) 0.5611(3) 0.0435(11) Uani 1 1 d . . .
H9 H 0.1165 -0.0815 0.4860 0.052 Uiso 1 1 calc R . .
C10 C 0.0506(4) -0.04011(19) 0.6225(3) 0.0348(10) Uani 1 1 d . . .
H10 H -0.0303 -0.0213 0.5895 0.042 Uiso 1 1 calc R . .
C11 C -0.1900(4) 0.02919(19) 0.7479(3) 0.0271(8) Uani 1 1 d . . .
C12 C -0.2428(4) 0.08560(19) 0.7256(3) 0.0361(10) Uani 1 1 d . . .
H12 H -0.1881 0.1195 0.7458 0.043 Uiso 1 1 calc R . .
C13 C -0.3745(5) 0.0927(3) 0.6741(4) 0.0544(13) Uani 1 1 d . . .
H13 H -0.4098 0.1315 0.6590 0.065 Uiso 1 1 calc R . .
C14 C -0.4548(5) 0.0439(3) 0.6446(4) 0.0586(15) Uani 1 1 d . . .
H14 H -0.5453 0.0489 0.6093 0.070 Uiso 1 1 calc R . .
C15 C -0.4037(5) -0.0123(3) 0.6663(5) 0.0549(15) Uani 1 1 d . . .
H15 H -0.4593 -0.0459 0.6455 0.066 Uiso 1 1 calc R . .
C16 C -0.2728(5) -0.0204(2) 0.7179(4) 0.0398(10) Uani 1 1 d . . .
H16 H -0.2388 -0.0593 0.7332 0.048 Uiso 1 1 calc R . .
C17 C 0.2966(4) 0.10217(17) 0.9920(3) 0.0263(8) Uani 1 1 d . . .
C18 C 0.3872(4) 0.0639(2) 0.9397(4) 0.0512(13) Uani 1 1 d . . .
H18 H 0.3485 0.0315 0.8992 0.061 Uiso 1 1 calc R . .
C19 C 0.5324(5) 0.0721(3) 0.9457(4) 0.0597(15) Uani 1 1 d . . .
H19 H 0.5936 0.0449 0.9108 0.072 Uiso 1 1 calc R . .
C20 C 0.5894(5) 0.1191(2) 1.0014(4) 0.0501(13) Uani 1 1 d . . .
H20 H 0.6897 0.1254 1.0034 0.060 Uiso 1 1 calc R . .
C21 C 0.5022(5) 0.1563(2) 1.0535(5) 0.0587(14) Uani 1 1 d . . .
H21 H 0.5420 0.1885 1.0935 0.070 Uiso 1 1 calc R . .
C22 C 0.3554(5) 0.1484(2) 1.0496(4) 0.0461(11) Uani 1 1 d . . .
H22 H 0.2954 0.1751 1.0871 0.055 Uiso 1 1 calc R . .
C23 C 0.0178(4) 0.15540(18) 1.0292(3) 0.0323(9) Uani 1 1 d . . .
C24 C 0.0233(6) 0.1642(2) 1.1397(3) 0.0533(13) Uani 1 1 d . . .
H24 H 0.0795 0.1386 1.1846 0.064 Uiso 1 1 calc R . .
C25 C -0.0526(7) 0.2103(3) 1.1858(5) 0.081(2) Uani 1 1 d . . .
H25 H -0.0479 0.2160 1.2621 0.097 Uiso 1 1 calc R . .
C26 C -0.1347(6) 0.2476(3) 1.1218(6) 0.084(2) Uani 1 1 d . . .
H26 H -0.1876 0.2788 1.1538 0.101 Uiso 1 1 calc R . .
C27 C -0.1401(6) 0.2397(2) 1.0105(5) 0.0726(16) Uani 1 1 d . . .
H27 H -0.1959 0.2657 0.9659 0.087 Uiso 1 1 calc R . .
C28 C -0.0644(5) 0.1942(2) 0.9645(4) 0.0472(11) Uani 1 1 d . . .
H28 H -0.0680 0.1890 0.8882 0.057 Uiso 1 1 calc R . .
N1 N 0.2122(4) 0.16887(15) 0.7505(3) 0.0362(8) Uani 1 1 d . . .
O1 O 0.1036(3) 0.10474(12) 0.64250(18) 0.0363(7) Uani 1 1 d . . .
B1 B 0.3953(7) 0.2935(3) 0.8692(4) 0.0519(14) Uani 1 1 d . . .
F1 F 0.2800(3) 0.25976(12) 0.9034(2) 0.0620(8) Uani 1 1 d . . .
F2 F 0.4720(4) 0.26071(15) 0.7982(2) 0.0905(11) Uani 1 1 d . . .
F3 F 0.3469(5) 0.34362(16) 0.8228(3) 0.1122(14) Uani 1 1 d . . .
F4 F 0.4779(3) 0.30714(17) 0.9592(3) 0.0872(11) Uani 1 1 d . . .
H1N H 0.238(4) 0.1866(18) 0.815(3) 0.041(12) Uiso 1 1 d . . .

loop_
_atom_site_aniso_label
_atom_site_aniso_U_11
_atom_site_aniso_U_22
_atom_site_aniso_U_33
_atom_site_aniso_U_23
_atom_site_aniso_U_13
_atom_site_aniso_U_12
Pt1 0.02597(12) 0.01881(11) 0.01746(11) -0.00139(7) 0.00387(7) -0.00424(9)
P1 0.0248(5) 0.0226(5) 0.0185(5) 0.0002(4) 0.0033(4) -0.0030(4)
P2 0.0282(5) 0.0204(5) 0.0238(5) -0.0023(4) 0.0033(4) -0.0034(4)
C1 0.0270(19) 0.0179(19) 0.0273(18) -0.0001(15) 0.0030(14) -0.0041(15)
C2 0.027(2) 0.025(2) 0.032(2) 0.0003(16) 0.0014(15) -0.0008(17)
C3 0.052(3) 0.044(3) 0.036(2) 0.014(2) 0.0093(19) -0.010(2)
C4 0.049(3) 0.038(3) 0.040(2) 0.0102(19) 0.0147(19) -0.006(2)
C5 0.025(2) 0.021(2) 0.0236(18) -0.0007(15) 0.0035(14) -0.0053(15)
C6 0.035(2) 0.038(2) 0.028(2) 0.0006(17) -0.0006(16) -0.0018(19)
C7 0.029(2) 0.037(3) 0.044(2) 0.0040(19) 0.0021(17) 0.0050(18)
C8 0.037(2) 0.038(3) 0.043(2) -0.011(2) 0.0093(18) 0.005(2)
C9 0.047(3) 0.057(3) 0.027(2) -0.011(2) 0.0000(18) 0.013(2)
C10 0.033(2) 0.049(3) 0.0223(19) -0.0044(18) -0.0026(15) 0.009(2)
C11 0.028(2) 0.033(2) 0.0205(18) -0.0046(17) 0.0035(14) -0.0005(18)
C12 0.034(2) 0.037(3) 0.037(2) -0.0014(18) -0.0004(17) 0.0032(19)
C13 0.041(3) 0.062(4) 0.060(3) 0.003(3) -0.006(2) 0.021(3)
C14 0.029(3) 0.090(5) 0.056(3) -0.004(3) -0.006(2) 0.006(3)
C15 0.033(3) 0.075(4) 0.057(3) -0.015(3) -0.003(2) -0.016(2)
C16 0.029(2) 0.044(3) 0.046(3) -0.003(2) -0.0018(19) -0.006(2)
C17 0.0249(19) 0.028(2) 0.0259(18) 0.0014(15) 0.0023(15) -0.0040(16)
C18 0.029(2) 0.062(3) 0.063(3) -0.030(2) 0.012(2) -0.008(2)
C19 0.032(3) 0.087(4) 0.060(3) -0.015(3) 0.013(2) -0.002(3)
C20 0.027(2) 0.065(4) 0.058(3) 0.016(3) -0.003(2) -0.011(2)
C21 0.048(3) 0.045(3) 0.083(4) -0.003(3) -0.023(3) -0.012(3)
C22 0.044(3) 0.032(3) 0.062(3) -0.013(2) -0.012(2) -0.001(2)
C23 0.031(2) 0.020(2) 0.046(2) -0.0087(18) 0.0153(17) -0.0098(17)
C24 0.079(4) 0.036(3) 0.046(3) -0.013(2) 0.026(2) -0.008(3)
C25 0.118(5) 0.044(4) 0.084(4) -0.033(3) 0.060(4) -0.021(4)
C26 0.076(4) 0.036(3) 0.143(6) -0.033(4) 0.051(4) -0.006(3)
C27 0.051(3) 0.040(3) 0.126(5) -0.019(3) 0.013(3) 0.004(3)
C28 0.040(3) 0.033(3) 0.068(3) -0.008(2) -0.001(2) 0.005(2)
N1 0.043(2) 0.032(2) 0.0343(19) 0.0023(15) 0.0040(15) -0.0134(16)
O1 0.0480(17) 0.0379(17) 0.0232(13) 0.0041(12) 0.0021(11) -0.0121(14)
B1 0.073(4) 0.045(3) 0.038(3) -0.001(2) 0.016(3) -0.014(3)
F1 0.0708(19) 0.0556(18) 0.0604(16) -0.0147(14) 0.0183(14) -0.0238(16)
F2 0.106(3) 0.089(3) 0.079(2) -0.0296(19) 0.0467(18) -0.008(2)
F3 0.172(4) 0.066(3) 0.100(3) 0.034(2) 0.020(3) 0.017(3)
F4 0.078(2) 0.126(3) 0.0590(17) -0.026(2) 0.0179(14) -0.048(2)

_geom_special_details            
; 
 All esds (except the esd in the dihedral angle between two l.s. planes) 
 are estimated using the full covariance matrix.  The cell esds are taken 
 into account individually in the estimation of esds in distances, angles 
 and torsion angles; correlations between esds in cell parameters are only 
 used when they are defined by crystal symmetry.  An approximate (isotropic) 
 treatment of cell esds is used for estimating esds involving l.s. planes. 
;

loop_
_geom_bond_atom_site_label_1
_geom_bond_atom_site_label_2
_geom_bond_distance
_geom_bond_site_symmetry_2
_geom_bond_publ_flag
Pt1 P1 2.3267(9) 3_557 ?
Pt1 P1 2.3267(9) . ?
Pt1 P2 2.3276(9) 3_557 ?
Pt1 P2 2.3277(9) . ?
P1 C1 1.770(4) . ?
P1 C11 1.811(4) . ?
P1 C5 1.812(4) . ?
P2 C1 1.762(3) . ?
P2 C23 1.815(4) . ?
P2 C17 1.820(4) . ?
C1 C2 1.386(5) . ?
C2 N1 1.314(5) . ?
C2 O1 1.348(4) . ?
C3 O1 1.471(4) . ?
C3 C4 1.508(6) . ?
C3 H3A 0.9900 . ?
C3 H3B 0.9900 . ?
C4 N1 1.456(5) . ?
C4 H4A 0.9900 . ?
C4 H4B 0.9900 . ?
C5 C10 1.377(5) . ?
C5 C6 1.396(5) . ?
C6 C7 1.380(5) . ?
C6 H6 0.9500 . ?
C7 C8 1.372(5) . ?
C7 H7 0.9500 . ?
C8 C9 1.370(5) . ?
C8 H8 0.9500 . ?
C9 C10 1.389(5) . ?
C9 H9 0.9500 . ?
C10 H10 0.9500 . ?
C11 C12 1.388(6) . ?
C11 C16 1.403(6) . ?
C12 C13 1.382(5) . ?
C12 H12 0.9500 . ?
C13 C14 1.376(7) . ?
C13 H13 0.9500 . ?
C14 C15 1.376(8) . ?
C14 H14 0.9500 . ?
C15 C16 1.379(7) . ?
C15 H15 0.9500 . ?
C16 H16 0.9500 . ?
C17 C22 1.368(5) . ?
C17 C18 1.381(5) . ?
C18 C19 1.371(6) . ?
C18 H18 0.9500 . ?
C19 C20 1.363(7) . ?
C19 H19 0.9500 . ?
C20 C21 1.345(7) . ?
C20 H20 0.9500 . ?
C21 C22 1.385(6) . ?
C21 H21 0.9500 . ?
C22 H22 0.9500 . ?
C23 C24 1.378(6) . ?
C23 C28 1.400(6) . ?
C24 C25 1.387(7) . ?
C24 H24 0.9500 . ?
C25 C26 1.376(8) . ?
C25 H25 0.9500 . ?
C26 C27 1.386(8) . ?
C26 H26 0.9500 . ?
C27 C28 1.378(6) . ?
C27 H27 0.9500 . ?
C28 H28 0.9500 . ?
N1 H1N 0.91(4) . ?
B1 F3 1.339(6) . ?
B1 F2 1.365(6) . ?
B1 F4 1.372(6) . ?
B1 F1 1.395(6) . ?

loop_
_geom_angle_atom_site_label_1
_geom_angle_atom_site_label_2
_geom_angle_atom_site_label_3
_geom_angle
_geom_angle_site_symmetry_1
_geom_angle_site_symmetry_3
_geom_angle_publ_flag
P1 Pt1 P1 180.000(9) 3_557 . ?
P1 Pt1 P2 72.01(3) 3_557 3_557 ?
P1 Pt1 P2 107.99(3) . 3_557 ?
P1 Pt1 P2 107.99(3) 3_557 . ?
P1 Pt1 P2 72.01(3) . . ?
P2 Pt1 P2 180.00(2) 3_557 . ?
C1 P1 C11 110.27(18) . . ?
C1 P1 C5 111.47(16) . . ?
C11 P1 C5 105.84(16) . . ?
C1 P1 Pt1 93.13(11) . . ?
C11 P1 Pt1 120.75(12) . . ?
C5 P1 Pt1 114.84(12) . . ?
C1 P2 C23 111.21(19) . . ?
C1 P2 C17 108.04(16) . . ?
C23 P2 C17 106.83(18) . . ?
C1 P2 Pt1 93.32(12) . . ?
C23 P2 Pt1 115.94(12) . . ?
C17 P2 Pt1 120.45(13) . . ?
C2 C1 P2 129.8(3) . . ?
C2 C1 P1 126.4(3) . . ?
P2 C1 P1 101.54(17) . . ?
N1 C2 O1 111.3(3) . . ?
N1 C2 C1 130.0(3) . . ?
O1 C2 C1 118.7(3) . . ?
O1 C3 C4 105.5(3) . . ?
O1 C3 H3A 110.6 . . ?
C4 C3 H3A 110.6 . . ?
O1 C3 H3B 110.6 . . ?
C4 C3 H3B 110.6 . . ?
H3A C3 H3B 108.8 . . ?
N1 C4 C3 101.7(3) . . ?
N1 C4 H4A 111.4 . . ?
C3 C4 H4A 111.4 . . ?
N1 C4 H4B 111.4 . . ?
C3 C4 H4B 111.4 . . ?
H4A C4 H4B 109.3 . . ?
C10 C5 C6 118.4(3) . . ?
C10 C5 P1 123.6(3) . . ?
C6 C5 P1 118.0(3) . . ?
C7 C6 C5 120.9(3) . . ?
C7 C6 H6 119.6 . . ?
C5 C6 H6 119.6 . . ?
C8 C7 C6 119.8(4) . . ?
C8 C7 H7 120.1 . . ?
C6 C7 H7 120.1 . . ?
C9 C8 C7 120.0(4) . . ?
C9 C8 H8 120.0 . . ?
C7 C8 H8 120.0 . . ?
C8 C9 C10 120.4(4) . . ?
C8 C9 H9 119.8 . . ?
C10 C9 H9 119.8 . . ?
C5 C10 C9 120.4(4) . . ?
C5 C10 H10 119.8 . . ?
C9 C10 H10 119.8 . . ?
C12 C11 C16 119.0(4) . . ?
C12 C11 P1 120.7(3) . . ?
C16 C11 P1 120.4(4) . . ?
C13 C12 C11 120.4(4) . . ?
C13 C12 H12 119.8 . . ?
C11 C12 H12 119.8 . . ?
C14 C13 C12 120.2(5) . . ?
C14 C13 H13 119.9 . . ?
C12 C13 H13 119.9 . . ?
C13 C14 C15 119.9(5) . . ?
C13 C14 H14 120.0 . . ?
C15 C14 H14 120.0 . . ?
C14 C15 C16 120.8(5) . . ?
C14 C15 H15 119.6 . . ?
C16 C15 H15 119.6 . . ?
C15 C16 C11 119.7(5) . . ?
C15 C16 H16 120.2 . . ?
C11 C16 H16 120.2 . . ?
C22 C17 C18 118.4(4) . . ?
C22 C17 P2 123.9(3) . . ?
C18 C17 P2 117.5(3) . . ?
C19 C18 C17 120.6(4) . . ?
C19 C18 H18 119.7 . . ?
C17 C18 H18 119.7 . . ?
C20 C19 C18 120.4(5) . . ?
C20 C19 H19 119.8 . . ?
C18 C19 H19 119.8 . . ?
C21 C20 C19 119.4(4) . . ?
C21 C20 H20 120.3 . . ?
C19 C20 H20 120.3 . . ?
C20 C21 C22 121.1(5) . . ?
C20 C21 H21 119.4 . . ?
C22 C21 H21 119.4 . . ?
C17 C22 C21 120.0(4) . . ?
C17 C22 H22 120.0 . . ?
C21 C22 H22 120.0 . . ?
C24 C23 C28 118.7(4) . . ?
C24 C23 P2 120.8(4) . . ?
C28 C23 P2 120.4(4) . . ?
C23 C24 C25 120.6(5) . . ?
C23 C24 H24 119.7 . . ?
C25 C24 H24 119.7 . . ?
C26 C25 C24 120.3(5) . . ?
C26 C25 H25 119.8 . . ?
C24 C25 H25 119.8 . . ?
C25 C26 C27 119.8(5) . . ?
C25 C26 H26 120.1 . . ?
C27 C26 H26 120.1 . . ?
C28 C27 C26 119.9(6) . . ?
C28 C27 H27 120.1 . . ?
C26 C27 H27 120.1 . . ?
C27 C28 C23 120.7(5) . . ?
C27 C28 H28 119.7 . . ?
C23 C28 H28 119.7 . . ?
C2 N1 C4 112.9(3) . . ?
C2 N1 H1N 122(3) . . ?
C4 N1 H1N 125(3) . . ?
C2 O1 C3 108.5(3) . . ?
F3 B1 F2 111.0(4) . . ?
F3 B1 F4 109.6(5) . . ?
F2 B1 F4 110.3(5) . . ?
F3 B1 F1 109.5(5) . . ?
F2 B1 F1 108.8(4) . . ?
F4 B1 F1 107.5(4) . . ?

_diffrn_measured_fraction_theta_max 0.994
_diffrn_reflns_theta_full        27.87
_diffrn_measured_fraction_theta_full 0.994
_refine_diff_density_max         1.275
_refine_diff_density_min         -1.805
_refine_diff_density_rms         0.189

 
data_5a_2MeOH
_publ_requested_journal          'Dalton Trans.'
_publ_contact_author_name        'Dr. Pierre Braunstein'
_publ_contact_author_address     
;Laboratoire de Chimie de Coordination
(UMR 7177 CNRS)
Universit\'e de Strasbourg
Institut Le Bel 
4, rue Blaise Pascal 
F-67070 Strasbourg 
France
;
_publ_contact_author_email       'braunst@chimie.u-strasbg.fr '
_publ_contact_author_phone       +33390241308
_publ_contact_author_fax         '+ 33390241322 '
loop_
_publ_author_name
_publ_author_address
'Braunstein, Pierre'
;Laboratoire de Chimie de Coordination
UMR 7177 CNRS
Universit\'e de Strasbourg
Institut Le Bel - 4 rue Blaise Pascal, 
CS 90032, F-67081 STRASBOURG cedex
France
;
'Zhang, Shuanming'
;Laboratoire de Chimie de Coordination
UMR 7177 CNRS
Universit\'e de Strasbourg
Institut Le Bel - 4 rue Blaise Pascal, 
CS 90032, F-67081 STRASBOURG cedex
France
;
'Pattacini, Roberto'
;Laboratoire de Chimie de Coordination
UMR 7177 CNRS
Universit\'e de Strasbourg
Institut Le Bel - 4 rue Blaise Pascal, 
CS 90032, F-67081 STRASBOURG cedex
France
;

'De Cola, Luisa'
;
Laboratoire de Chimie et des 
Biomat\'eriaux Supramol\'eculaires 
ISIS 8 all\'ee Gaspard Monge 
BP 70028 F-67083 Strasbourg Cedex
;

'Plummer Edward'
;
;

'Mauro, Matteo'
;
Laboratoire de Chimie et des 
Biomat\'eriaux Supramol\'eculaires 
ISIS 8 all\'ee Gaspard Monge 
BP 70028 F-67083 Strasbourg Cedex
;

'Gourlaouen, Christophe'
;
Laboratoire de Chimie Quantique, 
Institut de Chimie 
(UMR 7177 - CNRS/UdS), 
Universit\'e de Strasbourg, 
1 Rue Blaise Pascal BP 296/R8, 
F-67008 Strasbourg Cedex- France 
;

'Daniel, Chantal'
;
Laboratoire de Chimie Quantique, 
Institut de Chimie 
(UMR 7177 - CNRS/UdS), 
Universit\'e de Strasbourg, 
1 Rue Blaise Pascal BP 296/R8, 
F-67008 Strasbourg Cedex- France 
;
_audit_creation_method           SHELXL-97
_chemical_name_systematic        ?
_chemical_name_common            ?
_chemical_formula_moiety         'C60 H48 N2 P4 Pt, 2(C H4 O)'
_chemical_formula_sum            'C62 H56 N2 O2 P4 Pt'
_chemical_melting_point          ?

_exptl_crystal_description       block
_exptl_crystal_colour            yellow

_diffrn_ambient_temperature      173(2)
_chemical_formula_weight         1180.06

loop_
_atom_type_symbol
_atom_type_description
_atom_type_scat_dispersion_real
_atom_type_scat_dispersion_imag
_atom_type_scat_source
Pt Pt -1.7033 8.3905 'International Tables Vol C Tables 4.2.6.8 and 6.1.1.4'
P P 0.1023 0.0942 'International Tables Vol C Tables 4.2.6.8 and 6.1.1.4'
C C 0.0033 0.0016 'International Tables Vol C Tables 4.2.6.8 and 6.1.1.4'
N N 0.0061 0.0033 'International Tables Vol C Tables 4.2.6.8 and 6.1.1.4'
O O 0.0106 0.0060 'International Tables Vol C Tables 4.2.6.8 and 6.1.1.4'
H H 0.0000 0.0000 'International Tables Vol C Tables 4.2.6.8 and 6.1.1.4'

_symmetry_cell_setting           monoclinic
_symmetry_space_group_name_H-M   'C 2/c'
_symmetry_int_tables_number      15
_chemical_absolute_configuration ?

loop_
_symmetry_equiv_pos_as_xyz
'x, y, z'
'-x, y, -z+1/2'
'x+1/2, y+1/2, z'
'-x+1/2, y+1/2, -z+1/2'
'-x, -y, -z'
'x, -y, z-1/2'
'-x+1/2, -y+1/2, -z'
'x+1/2, -y+1/2, z-1/2'

_cell_length_a                   16.7379(6)
_cell_length_b                   14.9479(7)
_cell_length_c                   23.4480(6)
_cell_angle_alpha                90.00
_cell_angle_beta                 109.125(2)
_cell_angle_gamma                90.00
_cell_volume                     5542.8(4)
_cell_formula_units_Z            4
_cell_measurement_temperature    173(2)
_cell_measurement_reflns_used     5608
_cell_measurement_theta_min        0.998
_cell_measurement_theta_max        27.485
_exptl_crystal_size_max          0.15
_exptl_crystal_size_mid          0.14
_exptl_crystal_size_min          0.14
_exptl_crystal_density_meas      ?
_exptl_crystal_density_diffrn    1.414
_exptl_crystal_density_method    'not measured'
_exptl_crystal_F_000             2384
_exptl_absorpt_coefficient_mu    2.691
_exptl_absorpt_correction_type   multi-scan
_exptl_absorpt_correction_T_min  0.584
_exptl_absorpt_correction_T_max  0.680
_exptl_absorpt_process_details   
'L. Spek, J. Appl.Cryst. 2003, 36, 7, B. Blessing, Acta Cryst, 1995, A51, 33'


_exptl_special_details           
; 
 ? 
;
_diffrn_radiation_probe          x-ray
_diffrn_radiation_type           MoK\a
_diffrn_radiation_wavelength     0.71073
_diffrn_source                   'fine-focus sealed tube'
_diffrn_radiation_monochromator  graphite
_diffrn_measurement_device_type  KappaCCD
_diffrn_measurement_method       CCD
_diffrn_detector_area_resol_mean 9
_diffrn_standards_number         ?
_diffrn_standards_interval_count ?
_diffrn_standards_interval_time  ?
_diffrn_standards_decay_%        ?
_diffrn_reflns_number            10911
_diffrn_reflns_av_R_equivalents  0.0482
_diffrn_reflns_av_sigmaI/netI    0.0831
_diffrn_reflns_limit_h_min       -21
_diffrn_reflns_limit_h_max       21
_diffrn_reflns_limit_k_min       -18
_diffrn_reflns_limit_k_max       19
_diffrn_reflns_limit_l_min       -30
_diffrn_reflns_limit_l_max       30
_diffrn_reflns_theta_min         3.29
_diffrn_reflns_theta_max         27.49
_reflns_number_total             6343
_reflns_number_gt                4733
_reflns_threshold_expression     >2sigma(I)

_computing_cell_refinement       'HKL Scalepack (Otwinowski & Minor 1997)'
_computing_data_reduction        
'HKL Denzo and Scalepack (Otwinowski & Minor 1997)'
_computing_structure_solution    'SHELXS-97 (Sheldrick, 1997)'
_computing_structure_refinement  'SHELXL-97 (Sheldrick, 1997)'
_computing_molecular_graphics    ORTEP-3
_computing_publication_material  PLATON

_refine_special_details          
; 
 Refinement of F^2^ against ALL reflections.  The weighted R-factor wR and 
 goodness of fit S are based on F^2^, conventional R-factors R are based 
 on F, with F set to zero for negative F^2^. The threshold expression of 
 F^2^ > 2sigma(F^2^) is used only for calculating R-factors(gt) etc. and is 
 not relevant to the choice of reflections for refinement.  R-factors based 
 on F^2^ are statistically about twice as large as those based on F, and R- 
 factors based on ALL data will be even larger. 
;

_refine_ls_structure_factor_coef Fsqd
_refine_ls_matrix_type           full
_refine_ls_weighting_scheme      calc
_refine_ls_weighting_details     
'calc w=1/[\s^2^(Fo^2^)+(0.0444P)^2^+0.0000P] where P=(Fo^2^+2Fc^2^)/3'
_atom_sites_solution_primary     direct
_atom_sites_solution_secondary   difmap
_atom_sites_solution_hydrogens   geom
_refine_ls_hydrogen_treatment    constr
_refine_ls_extinction_method     none
_refine_ls_extinction_coef       ?
_refine_ls_number_reflns         6343
_refine_ls_number_parameters     323
_refine_ls_number_restraints     19
_refine_ls_R_factor_all          0.0741
_refine_ls_R_factor_gt           0.0430
_refine_ls_wR_factor_ref         0.0946
_refine_ls_wR_factor_gt          0.0843
_refine_ls_goodness_of_fit_ref   0.999
_refine_ls_restrained_S_all      1.014
_refine_ls_shift/su_max          0.001
_refine_ls_shift/su_mean         0.000

loop_
_atom_site_label
_atom_site_type_symbol
_atom_site_fract_x
_atom_site_fract_y
_atom_site_fract_z
_atom_site_U_iso_or_equiv
_atom_site_adp_type
_atom_site_occupancy
_atom_site_symmetry_multiplicity
_atom_site_calc_flag
_atom_site_refinement_flags
_atom_site_disorder_assembly
_atom_site_disorder_group
Pt1 Pt 0.0000 0.289496(16) 0.2500 0.02234(9) Uani 1 2 d S . .
P1 P 0.11074(7) 0.28384(8) 0.33968(5) 0.0214(2) Uani 1 1 d . . .
P2 P 0.12586(7) 0.29613(8) 0.22951(5) 0.0217(2) Uani 1 1 d . . .
C1 C 0.1900(3) 0.2930(3) 0.30591(18) 0.0248(9) Uani 1 1 d . . .
C2 C 0.2801(3) 0.2977(3) 0.3325(2) 0.0273(10) Uani 1 1 d . . .
C3 C 0.3350(3) 0.2933(3) 0.2981(2) 0.0351(11) Uani 1 1 d . . .
H3 H 0.3129 0.2870 0.2564 0.042 Uiso 1 1 calc R . .
C4 C 0.4215(3) 0.2983(3) 0.3258(3) 0.0448(13) Uani 1 1 d . . .
H4 H 0.4554 0.2959 0.3014 0.054 Uiso 1 1 calc R . .
C5 C 0.4081(3) 0.3116(3) 0.4182(2) 0.0417(13) Uani 1 1 d . . .
H5 H 0.4324 0.3179 0.4598 0.050 Uiso 1 1 calc R . .
C6 C 0.3213(3) 0.3083(3) 0.3950(2) 0.0311(11) Uani 1 1 d . . .
H6 H 0.2895 0.3132 0.4208 0.037 Uiso 1 1 calc R . .
C7 C 0.1158(3) 0.3720(3) 0.39428(17) 0.0264(10) Uani 1 1 d . . .
C8 C 0.1426(3) 0.4569(3) 0.3836(2) 0.0348(11) Uani 1 1 d . . .
H8 H 0.1631 0.4657 0.3516 0.042 Uiso 1 1 calc R . .
C9 C 0.1387(3) 0.5277(4) 0.4202(2) 0.0474(14) Uani 1 1 d . . .
H9 H 0.1571 0.5840 0.4130 0.057 Uiso 1 1 calc R . .
C10 C 0.1081(4) 0.5159(4) 0.4670(2) 0.0545(16) Uani 1 1 d . . .
H10 H 0.1052 0.5643 0.4912 0.065 Uiso 1 1 calc R . .
C11 C 0.0814(3) 0.4329(4) 0.4786(2) 0.0489(15) Uani 1 1 d . . .
H11 H 0.0615 0.4252 0.5109 0.059 Uiso 1 1 calc R . .
C12 C 0.0841(3) 0.3599(4) 0.44192(18) 0.0349(11) Uani 1 1 d . . .
H12 H 0.0650 0.3041 0.4492 0.042 Uiso 1 1 calc R . .
C13 C 0.1148(3) 0.1783(3) 0.38046(18) 0.0246(10) Uani 1 1 d . . .
C14 C 0.0569(3) 0.1119(3) 0.35332(19) 0.0329(11) Uani 1 1 d . . .
H14 H 0.0173 0.1221 0.3155 0.039 Uiso 1 1 calc R . .
C15 C 0.0573(3) 0.0307(3) 0.3818(2) 0.0434(13) Uani 1 1 d . . .
H15 H 0.0178 -0.0130 0.3632 0.052 Uiso 1 1 calc R . .
C16 C 0.1163(3) 0.0146(4) 0.4377(2) 0.0426(13) Uani 1 1 d . . .
H16 H 0.1163 -0.0396 0.4573 0.051 Uiso 1 1 calc R . .
C17 C 0.1753(3) 0.0795(3) 0.4644(2) 0.0407(13) Uani 1 1 d . . .
H17 H 0.2163 0.0683 0.5015 0.049 Uiso 1 1 calc R . .
C18 C 0.1742(3) 0.1607(3) 0.43646(18) 0.0319(11) Uani 1 1 d . . .
H18 H 0.2136 0.2042 0.4553 0.038 Uiso 1 1 calc R . .
C19 C 0.1392(3) 0.3995(3) 0.19209(17) 0.0272(10) Uani 1 1 d . . .
C20 C 0.2034(3) 0.4112(3) 0.16674(19) 0.0380(12) Uani 1 1 d . . .
H20 H 0.2394 0.3639 0.1666 0.046 Uiso 1 1 calc R . .
C21 C 0.2137(4) 0.4924(4) 0.1419(2) 0.0462(14) Uani 1 1 d . . .
H21 H 0.2570 0.4998 0.1256 0.055 Uiso 1 1 calc R . .
C22 C 0.1608(4) 0.5613(4) 0.1412(2) 0.0506(16) Uani 1 1 d . . .
H22 H 0.1676 0.6158 0.1243 0.061 Uiso 1 1 calc R . .
C23 C 0.0966(4) 0.5508(4) 0.1657(2) 0.0509(15) Uani 1 1 d . . .
H23 H 0.0604 0.5982 0.1650 0.061 Uiso 1 1 calc R . .
C24 C 0.0860(3) 0.4703(3) 0.19103(19) 0.0356(12) Uani 1 1 d . . .
H24 H 0.0428 0.4638 0.2075 0.043 Uiso 1 1 calc R . .
C25 C 0.1468(3) 0.2058(3) 0.18460(19) 0.0257(10) Uani 1 1 d . . .
C26 C 0.1225(3) 0.2125(3) 0.1217(2) 0.0337(11) Uani 1 1 d . . .
H26 H 0.1011 0.2661 0.1027 0.040 Uiso 1 1 calc R . .
C27 C 0.1304(3) 0.1390(4) 0.0879(2) 0.0439(13) Uani 1 1 d . . .
H27 H 0.1146 0.1434 0.0461 0.053 Uiso 1 1 calc R . .
C28 C 0.1615(3) 0.0591(4) 0.1161(2) 0.0497(15) Uani 1 1 d . . .
H28 H 0.1660 0.0098 0.0932 0.060 Uiso 1 1 calc R . .
C29 C 0.1858(3) 0.0522(4) 0.1780(2) 0.0481(14) Uani 1 1 d . . .
H29 H 0.2071 -0.0016 0.1969 0.058 Uiso 1 1 calc R . .
C30 C 0.1786(3) 0.1260(3) 0.2122(2) 0.0374(12) Uani 1 1 d . . .
H30 H 0.1953 0.1214 0.2541 0.045 Uiso 1 1 calc R . .
C31 C 0.6806(6) 0.2866(6) 0.4158(5) 0.118(3) Uani 1 1 d DU . .
H31A H 0.6889 0.3502 0.4172 0.177 Uiso 1 1 calc R . .
H31B H 0.6556 0.2679 0.3746 0.177 Uiso 1 1 calc R . .
H31C H 0.7341 0.2572 0.4332 0.177 Uiso 1 1 calc R . .
N1 N 0.4600(3) 0.3064(3) 0.3856(2) 0.0461(12) Uani 1 1 d . . .
O1 O 0.6265(3) 0.2639(4) 0.4485(3) 0.0983(17) Uani 1 1 d DU . .
H1 H 0.5797 0.2856 0.4320 0.147 Uiso 1 1 calc R . .

loop_
_atom_site_aniso_label
_atom_site_aniso_U_11
_atom_site_aniso_U_22
_atom_site_aniso_U_33
_atom_site_aniso_U_23
_atom_site_aniso_U_13
_atom_site_aniso_U_12
Pt1 0.02447(14) 0.02272(14) 0.02048(13) 0.000 0.00824(9) 0.000
P1 0.0222(6) 0.0220(6) 0.0197(5) 0.0003(5) 0.0066(4) -0.0009(5)
P2 0.0240(6) 0.0223(6) 0.0210(5) 0.0004(5) 0.0103(4) 0.0006(5)
C1 0.024(2) 0.027(2) 0.024(2) 0.0001(19) 0.0092(18) 0.001(2)
C2 0.029(2) 0.016(2) 0.036(2) 0.0036(19) 0.010(2) -0.002(2)
C3 0.030(3) 0.035(3) 0.043(3) 0.002(2) 0.016(2) -0.002(2)
C4 0.034(3) 0.043(3) 0.065(4) 0.001(3) 0.026(3) 0.000(3)
C5 0.033(3) 0.038(3) 0.047(3) -0.001(2) 0.004(2) -0.004(2)
C6 0.028(3) 0.030(3) 0.034(3) 0.000(2) 0.009(2) -0.002(2)
C7 0.018(2) 0.030(3) 0.026(2) -0.003(2) 0.0017(17) 0.000(2)
C8 0.033(3) 0.031(3) 0.038(3) 0.000(2) 0.009(2) 0.000(2)
C9 0.048(3) 0.028(3) 0.056(3) -0.010(3) 0.003(3) 0.001(3)
C10 0.053(4) 0.048(4) 0.052(3) -0.029(3) 0.003(3) 0.009(3)
C11 0.047(3) 0.064(4) 0.035(3) -0.012(3) 0.013(2) 0.010(3)
C12 0.037(3) 0.037(3) 0.030(2) -0.005(2) 0.010(2) 0.002(2)
C13 0.027(2) 0.023(2) 0.028(2) -0.0014(19) 0.0144(19) -0.001(2)
C14 0.029(3) 0.032(3) 0.032(2) 0.004(2) 0.004(2) -0.003(2)
C15 0.039(3) 0.032(3) 0.058(3) 0.004(3) 0.014(3) -0.007(3)
C16 0.056(4) 0.030(3) 0.045(3) 0.015(2) 0.022(3) 0.004(3)
C17 0.054(3) 0.039(3) 0.030(2) 0.008(2) 0.014(2) 0.008(3)
C18 0.036(3) 0.032(3) 0.025(2) -0.001(2) 0.006(2) 0.003(2)
C19 0.032(3) 0.029(3) 0.019(2) -0.0018(19) 0.0055(18) -0.005(2)
C20 0.044(3) 0.040(3) 0.034(3) 0.002(2) 0.020(2) -0.008(3)
C21 0.060(4) 0.046(4) 0.038(3) 0.007(3) 0.025(3) -0.016(3)
C22 0.070(4) 0.035(3) 0.036(3) 0.010(2) 0.003(3) -0.018(3)
C23 0.062(4) 0.026(3) 0.057(3) 0.005(3) 0.010(3) 0.000(3)
C24 0.038(3) 0.030(3) 0.038(3) 0.001(2) 0.011(2) -0.001(2)
C25 0.023(2) 0.027(2) 0.030(2) -0.001(2) 0.0128(18) -0.003(2)
C26 0.041(3) 0.033(3) 0.030(2) -0.002(2) 0.016(2) 0.000(2)
C27 0.049(3) 0.049(4) 0.036(3) -0.011(3) 0.016(2) -0.004(3)
C28 0.053(4) 0.043(4) 0.063(4) -0.023(3) 0.031(3) 0.006(3)
C29 0.050(3) 0.035(3) 0.063(4) 0.001(3) 0.022(3) 0.009(3)
C30 0.039(3) 0.031(3) 0.041(3) 0.003(2) 0.012(2) 0.005(3)
C31 0.115(6) 0.092(6) 0.180(7) 0.007(5) 0.094(6) 0.011(5)
N1 0.027(2) 0.043(3) 0.062(3) 0.005(2) 0.006(2) 0.000(2)
O1 0.062(3) 0.109(4) 0.124(4) 0.020(3) 0.030(3) 0.005(3)

_geom_special_details            
; 
 All esds (except the esd in the dihedral angle between two l.s. planes) 
 are estimated using the full covariance matrix.  The cell esds are taken 
 into account individually in the estimation of esds in distances, angles 
 and torsion angles; correlations between esds in cell parameters are only 
 used when they are defined by crystal symmetry.  An approximate (isotropic) 
 treatment of cell esds is used for estimating esds involving l.s. planes. 
;

loop_
_geom_bond_atom_site_label_1
_geom_bond_atom_site_label_2
_geom_bond_distance
_geom_bond_site_symmetry_2
_geom_bond_publ_flag
Pt1 P1 2.3045(10) . ?
Pt1 P1 2.3045(10) 2 ?
Pt1 P2 2.3112(11) 2 ?
Pt1 P2 2.3112(11) . ?
P1 C1 1.758(4) . ?
P1 C7 1.820(4) . ?
P1 C13 1.834(4) . ?
P1 P2 2.6831(14) . ?
P2 C1 1.762(4) . ?
P2 C25 1.815(4) . ?
P2 C19 1.826(5) . ?
C1 C2 1.433(6) . ?
C2 C3 1.408(6) . ?
C2 C6 1.409(6) . ?
C3 C4 1.380(7) . ?
C3 H3 0.9300 . ?
C4 N1 1.342(7) . ?
C4 H4 0.9300 . ?
C5 N1 1.336(7) . ?
C5 C6 1.375(7) . ?
C5 H5 0.9300 . ?
C6 H6 0.9300 . ?
C7 C8 1.396(7) . ?
C7 C12 1.397(6) . ?
C8 C9 1.378(7) . ?
C8 H8 0.9300 . ?
C9 C10 1.366(8) . ?
C9 H9 0.9300 . ?
C10 C11 1.376(8) . ?
C10 H10 0.9300 . ?
C11 C12 1.398(7) . ?
C11 H11 0.9300 . ?
C12 H12 0.9300 . ?
C13 C14 1.387(6) . ?
C13 C18 1.388(6) . ?
C14 C15 1.385(6) . ?
C14 H14 0.9300 . ?
C15 C16 1.380(7) . ?
C15 H15 0.9300 . ?
C16 C17 1.380(7) . ?
C16 H16 0.9300 . ?
C17 C18 1.375(6) . ?
C17 H17 0.9300 . ?
C18 H18 0.9300 . ?
C19 C24 1.379(6) . ?
C19 C20 1.398(6) . ?
C20 C21 1.382(7) . ?
C20 H20 0.9300 . ?
C21 C22 1.355(8) . ?
C21 H21 0.9300 . ?
C22 C23 1.381(8) . ?
C22 H22 0.9300 . ?
C23 C24 1.378(7) . ?
C23 H23 0.9300 . ?
C24 H24 0.9300 . ?
C25 C30 1.379(6) . ?
C25 C26 1.399(6) . ?
C26 C27 1.387(7) . ?
C26 H26 0.9300 . ?
C27 C28 1.381(7) . ?
C27 H27 0.9300 . ?
C28 C29 1.378(7) . ?
C28 H28 0.9300 . ?
C29 C30 1.392(7) . ?
C29 H29 0.9300 . ?
C30 H30 0.9300 . ?
C31 O1 1.406(7) . ?
C31 H31A 0.9600 . ?
C31 H31B 0.9600 . ?
C31 H31C 0.9600 . ?
O1 H1 0.8200 . ?

loop_
_geom_angle_atom_site_label_1
_geom_angle_atom_site_label_2
_geom_angle_atom_site_label_3
_geom_angle
_geom_angle_site_symmetry_1
_geom_angle_site_symmetry_3
_geom_angle_publ_flag
P1 Pt1 P1 175.80(6) . 2 ?
P1 Pt1 P2 109.10(4) . 2 ?
P1 Pt1 P2 71.09(4) 2 2 ?
P1 Pt1 P2 71.08(4) . . ?
P1 Pt1 P2 109.11(4) 2 . ?
P2 Pt1 P2 175.08(6) 2 . ?
C1 P1 C7 113.1(2) . . ?
C1 P1 C13 113.4(2) . . ?
C7 P1 C13 105.7(2) . . ?
C1 P1 Pt1 94.94(14) . . ?
C7 P1 Pt1 116.98(14) . . ?
C13 P1 Pt1 112.85(14) . . ?
C7 P1 P2 129.09(15) . . ?
C13 P1 P2 124.19(14) . . ?
Pt1 P1 P2 54.58(3) . . ?
C1 P2 C25 113.6(2) . . ?
C1 P2 C19 112.4(2) . . ?
C25 P2 C19 105.8(2) . . ?
C1 P2 Pt1 94.61(15) . . ?
C25 P2 Pt1 116.81(14) . . ?
C19 P2 Pt1 113.57(16) . . ?
C25 P2 P1 127.20(15) . . ?
C19 P2 P1 125.84(14) . . ?
Pt1 P2 P1 54.34(3) . . ?
C2 C1 P1 130.5(3) . . ?
C2 C1 P2 130.1(3) . . ?
P1 C1 P2 99.3(2) . . ?
C3 C2 C6 114.3(4) . . ?
C3 C2 C1 122.7(4) . . ?
C6 C2 C1 123.0(4) . . ?
C4 C3 C2 120.6(5) . . ?
C4 C3 H3 119.7 . . ?
C2 C3 H3 119.7 . . ?
N1 C4 C3 124.5(5) . . ?
N1 C4 H4 117.7 . . ?
C3 C4 H4 117.7 . . ?
N1 C5 C6 124.9(5) . . ?
N1 C5 H5 117.5 . . ?
C6 C5 H5 117.5 . . ?
C5 C6 C2 120.6(5) . . ?
C5 C6 H6 119.7 . . ?
C2 C6 H6 119.7 . . ?
C8 C7 C12 119.3(4) . . ?
C8 C7 P1 118.4(3) . . ?
C12 C7 P1 121.8(4) . . ?
C9 C8 C7 120.2(5) . . ?
C9 C8 H8 119.9 . . ?
C7 C8 H8 119.9 . . ?
C10 C9 C8 120.5(5) . . ?
C10 C9 H9 119.7 . . ?
C8 C9 H9 119.7 . . ?
C9 C10 C11 120.4(5) . . ?
C9 C10 H10 119.8 . . ?
C11 C10 H10 119.8 . . ?
C10 C11 C12 120.3(5) . . ?
C10 C11 H11 119.9 . . ?
C12 C11 H11 119.9 . . ?
C7 C12 C11 119.3(5) . . ?
C7 C12 H12 120.4 . . ?
C11 C12 H12 120.4 . . ?
C14 C13 C18 118.3(4) . . ?
C14 C13 P1 118.4(3) . . ?
C18 C13 P1 123.3(3) . . ?
C15 C14 C13 120.9(4) . . ?
C15 C14 H14 119.5 . . ?
C13 C14 H14 119.5 . . ?
C16 C15 C14 120.0(5) . . ?
C16 C15 H15 120.0 . . ?
C14 C15 H15 120.0 . . ?
C17 C16 C15 119.4(5) . . ?
C17 C16 H16 120.3 . . ?
C15 C16 H16 120.3 . . ?
C18 C17 C16 120.6(4) . . ?
C18 C17 H17 119.7 . . ?
C16 C17 H17 119.7 . . ?
C17 C18 C13 120.8(4) . . ?
C17 C18 H18 119.6 . . ?
C13 C18 H18 119.6 . . ?
C24 C19 C20 118.5(4) . . ?
C24 C19 P2 118.6(4) . . ?
C20 C19 P2 122.9(4) . . ?
C21 C20 C19 120.6(5) . . ?
C21 C20 H20 119.7 . . ?
C19 C20 H20 119.7 . . ?
C22 C21 C20 120.0(5) . . ?
C22 C21 H21 120.0 . . ?
C20 C21 H21 120.0 . . ?
C21 C22 C23 120.2(5) . . ?
C21 C22 H22 119.9 . . ?
C23 C22 H22 119.9 . . ?
C24 C23 C22 120.4(5) . . ?
C24 C23 H23 119.8 . . ?
C22 C23 H23 119.8 . . ?
C23 C24 C19 120.3(5) . . ?
C23 C24 H24 119.9 . . ?
C19 C24 H24 119.9 . . ?
C30 C25 C26 119.4(4) . . ?
C30 C25 P2 119.3(3) . . ?
C26 C25 P2 120.9(4) . . ?
C27 C26 C25 119.8(5) . . ?
C27 C26 H26 120.1 . . ?
C25 C26 H26 120.1 . . ?
C28 C27 C26 120.2(4) . . ?
C28 C27 H27 119.9 . . ?
C26 C27 H27 119.9 . . ?
C29 C28 C27 120.3(5) . . ?
C29 C28 H28 119.8 . . ?
C27 C28 H28 119.8 . . ?
C28 C29 C30 119.7(5) . . ?
C28 C29 H29 120.1 . . ?
C30 C29 H29 120.1 . . ?
C25 C30 C29 120.5(4) . . ?
C25 C30 H30 119.7 . . ?
C29 C30 H30 119.7 . . ?
O1 C31 H31A 109.5 . . ?
O1 C31 H31B 109.5 . . ?
H31A C31 H31B 109.5 . . ?
O1 C31 H31C 109.5 . . ?
H31A C31 H31C 109.5 . . ?
H31B C31 H31C 109.5 . . ?
C5 N1 C4 115.0(4) . . ?
C31 O1 H1 109.5 . . ?

_diffrn_measured_fraction_theta_max 0.996
_diffrn_reflns_theta_full        27.49
_diffrn_measured_fraction_theta_full 0.996
_refine_diff_density_max         2.155
_refine_diff_density_min         -1.377
_refine_diff_density_rms         0.136

 
data_6b_4CH2Cl2

_publ_requested_journal          'Dalton Trans.'
_publ_contact_author_name        'Dr. Pierre Braunstein'
_publ_contact_author_address     
;Laboratoire de Chimie de Coordination
(UMR 7177 CNRS)
Universit\'e de Strasbourg
Institut Le Bel 
4, rue Blaise Pascal 
F-67070 Strasbourg 
France
;
_publ_contact_author_email       'braunst@chimie.u-strasbg.fr '
_publ_contact_author_phone       +33390241308
_publ_contact_author_fax         '+ 33390241322 '
loop_
_publ_author_name
_publ_author_address
'Braunstein, Pierre'
;Laboratoire de Chimie de Coordination
UMR 7177 CNRS
Universit\'e de Strasbourg
Institut Le Bel - 4 rue Blaise Pascal, 
CS 90032, F-67081 STRASBOURG cedex
France
;
'Zhang, Shuanming'
;Laboratoire de Chimie de Coordination
UMR 7177 CNRS
Universit\'e de Strasbourg
Institut Le Bel - 4 rue Blaise Pascal, 
CS 90032, F-67081 STRASBOURG cedex
France
;
'Pattacini, Roberto'
;Laboratoire de Chimie de Coordination
UMR 7177 CNRS
Universit\'e de Strasbourg
Institut Le Bel - 4 rue Blaise Pascal, 
CS 90032, F-67081 STRASBOURG cedex
France
;

'De Cola, Luisa'
;
Laboratoire de Chimie et des 
Biomat\'eriaux Supramol\'eculaires 
ISIS 8 all\'ee Gaspard Monge 
BP 70028 F-67083 Strasbourg Cedex
;

'Plummer Edward'
;
;

'Mauro, Matteo'
;
Laboratoire de Chimie et des 
Biomat\'eriaux Supramol\'eculaires 
ISIS 8 all\'ee Gaspard Monge 
BP 70028 F-67083 Strasbourg Cedex
;

'Gourlaouen, Christophe'
;
Laboratoire de Chimie Quantique, 
Institut de Chimie 
(UMR 7177 - CNRS/UdS), 
Universit\'e de Strasbourg, 
1 Rue Blaise Pascal BP 296/R8, 
F-67008 Strasbourg Cedex- France 
;

'Daniel, Chantal'
;
Laboratoire de Chimie Quantique, 
Institut de Chimie 
(UMR 7177 - CNRS/UdS), 
Universit\'e de Strasbourg, 
1 Rue Blaise Pascal BP 296/R8, 
F-67008 Strasbourg Cedex- France 
;
_audit_creation_method           SHELXL-97
_chemical_name_systematic        ?
_chemical_name_common            ?
_chemical_formula_moiety         'C60 H50 N2 P4 Pd, 4(C H2 Cl2), 2(Cl)'
_chemical_formula_sum            'C64 H58 Cl10 N2 P4 Pd'
_chemical_melting_point          ?

_exptl_crystal_description       prism
_exptl_crystal_colour            yellow

_diffrn_ambient_temperature      173(2)
_chemical_formula_weight         1439.90

loop_
_atom_type_symbol
_atom_type_description
_atom_type_scat_dispersion_real
_atom_type_scat_dispersion_imag
_atom_type_scat_source
Pd Pd -0.9988 1.0072 'International Tables Vol C Tables 4.2.6.8 and 6.1.1.4'
P P 0.1023 0.0942 'International Tables Vol C Tables 4.2.6.8 and 6.1.1.4'
C C 0.0033 0.0016 'International Tables Vol C Tables 4.2.6.8 and 6.1.1.4'
N N 0.0061 0.0033 'International Tables Vol C Tables 4.2.6.8 and 6.1.1.4'
Cl Cl 0.1484 0.1585 'International Tables Vol C Tables 4.2.6.8 and 6.1.1.4'
H H 0.0000 0.0000 'International Tables Vol C Tables 4.2.6.8 and 6.1.1.4'

_symmetry_cell_setting           monoclinic
_symmetry_space_group_name_H-M   'P 21/c'
_symmetry_int_tables_number      14
_chemical_absolute_configuration ?

loop_
_symmetry_equiv_pos_as_xyz
'x, y, z'
'-x, y+1/2, -z+1/2'
'-x, -y, -z'
'x, -y-1/2, z-1/2'

_cell_length_a                   11.7472(5)
_cell_length_b                   18.3989(8)
_cell_length_c                   15.4885(6)
_cell_angle_alpha                90.00
_cell_angle_beta                 102.738(2)
_cell_angle_gamma                90.00
_cell_volume                     3265.2(2)
_cell_formula_units_Z            2
_cell_measurement_temperature    173(2)
_cell_measurement_reflns_used     7073
_cell_measurement_theta_min        0.998
_cell_measurement_theta_max        27.103
_exptl_crystal_size_max          0.2
_exptl_crystal_size_mid          0.2
_exptl_crystal_size_min          0.15
_exptl_crystal_density_meas      ?
_exptl_crystal_density_diffrn    1.465
_exptl_crystal_density_method    'not measured'
_exptl_crystal_F_000             1464
_exptl_absorpt_coefficient_mu    0.832
_exptl_absorpt_correction_type   none
_exptl_absorpt_correction_T_min  ?
_exptl_absorpt_correction_T_max  ?
_exptl_absorpt_process_details   ?

_exptl_special_details           
; 
 ? 
;
_diffrn_radiation_probe          x-ray
_diffrn_radiation_type           MoK\a
_diffrn_radiation_wavelength     0.71073
_diffrn_source                   'fine-focus sealed tube'
_diffrn_radiation_monochromator  graphite
_diffrn_measurement_device_type  KappaCCD
_diffrn_measurement_method       CCD
_diffrn_detector_area_resol_mean 9
_diffrn_standards_number         ?
_diffrn_standards_interval_count ?
_diffrn_standards_interval_time  ?
_diffrn_standards_decay_%        ?
_diffrn_reflns_number            12727
_diffrn_reflns_av_R_equivalents  0.0489
_diffrn_reflns_av_sigmaI/netI    0.0823
_diffrn_reflns_limit_h_min       -15
_diffrn_reflns_limit_h_max       15
_diffrn_reflns_limit_k_min       -23
_diffrn_reflns_limit_k_max       21
_diffrn_reflns_limit_l_min       -19
_diffrn_reflns_limit_l_max       19
_diffrn_reflns_theta_min         2.59
_diffrn_reflns_theta_max         27.11
_reflns_number_total             7174
_reflns_number_gt                4503
_reflns_threshold_expression     >2sigma(I)

_computing_cell_refinement       'HKL Scalepack (Otwinowski & Minor 1997)'
_computing_data_reduction        
'HKL Denzo and Scalepack (Otwinowski & Minor 1997)'
_computing_structure_solution    'SHELXS-97 (Sheldrick, 1997)'
_computing_structure_refinement  'SHELXL-97 (Sheldrick, 1997)'
_computing_molecular_graphics    ORTEP-3
_computing_publication_material  PLATON

_refine_special_details          
; 
 Refinement of F^2^ against ALL reflections.  The weighted R-factor wR and 
 goodness of fit S are based on F^2^, conventional R-factors R are based 
 on F, with F set to zero for negative F^2^. The threshold expression of 
 F^2^ > 2sigma(F^2^) is used only for calculating R-factors(gt) etc. and is 
 not relevant to the choice of reflections for refinement.  R-factors based 
 on F^2^ are statistically about twice as large as those based on F, and R- 
 factors based on ALL data will be even larger. 
;

_refine_ls_structure_factor_coef Fsqd
_refine_ls_matrix_type           full
_refine_ls_weighting_scheme      calc
_refine_ls_weighting_details     
'calc w=1/[\s^2^(Fo^2^)+(0.0741P)^2^+0.0000P] where P=(Fo^2^+2Fc^2^)/3'
_atom_sites_solution_primary     direct
_atom_sites_solution_secondary   difmap
_atom_sites_solution_hydrogens   geom
_refine_ls_hydrogen_treatment    mixed
_refine_ls_extinction_method     none
_refine_ls_extinction_coef       ?
_refine_ls_number_reflns         7174
_refine_ls_number_parameters     371
_refine_ls_number_restraints     0
_refine_ls_R_factor_all          0.1013
_refine_ls_R_factor_gt           0.0507
_refine_ls_wR_factor_ref         0.1443
_refine_ls_wR_factor_gt          0.1236
_refine_ls_goodness_of_fit_ref   1.040
_refine_ls_restrained_S_all      1.040
_refine_ls_shift/su_max          0.001
_refine_ls_shift/su_mean         0.000

loop_
_atom_site_label
_atom_site_type_symbol
_atom_site_fract_x
_atom_site_fract_y
_atom_site_fract_z
_atom_site_U_iso_or_equiv
_atom_site_adp_type
_atom_site_occupancy
_atom_site_symmetry_multiplicity
_atom_site_calc_flag
_atom_site_refinement_flags
_atom_site_disorder_assembly
_atom_site_disorder_group
Pd1 Pd 1.0000 1.0000 1.0000 0.02172(13) Uani 1 2 d S . .
P1 P 0.89918(8) 1.03735(5) 0.86190(6) 0.0224(2) Uani 1 1 d . . .
P2 P 0.83888(8) 0.92477(5) 0.95476(6) 0.0228(2) Uani 1 1 d . . .
C1 C 0.7785(3) 0.9792(2) 0.8615(3) 0.0242(9) Uani 1 1 d . . .
C2 C 0.6749(3) 0.9714(2) 0.7953(2) 0.0236(8) Uani 1 1 d . . .
C3 C 0.5910(3) 0.9156(2) 0.7977(3) 0.0291(9) Uani 1 1 d . . .
H3 H 0.6012 0.8844 0.8476 0.035 Uiso 1 1 calc R . .
C4 C 0.4974(4) 0.9064(2) 0.7301(3) 0.0323(10) Uani 1 1 d . . .
H4 H 0.4444 0.8679 0.7328 0.039 Uiso 1 1 calc R . .
C5 C 0.5514(4) 1.0058(2) 0.6540(3) 0.0318(9) Uani 1 1 d . . .
H5 H 0.5369 1.0368 0.6037 0.038 Uiso 1 1 calc R . .
C6 C 0.6467(4) 1.0177(2) 0.7209(3) 0.0289(9) Uani 1 1 d . . .
H6 H 0.6956 1.0582 0.7172 0.035 Uiso 1 1 calc R . .
C7 C 0.8573(3) 1.1321(2) 0.8524(2) 0.0248(8) Uani 1 1 d . . .
C8 C 0.7603(4) 1.1552(2) 0.8837(3) 0.0333(10) Uani 1 1 d . . .
H8 H 0.7097 1.1201 0.9003 0.040 Uiso 1 1 calc R . .
C9 C 0.7372(4) 1.2281(2) 0.8908(3) 0.0425(12) Uani 1 1 d . . .
H9 H 0.6716 1.2430 0.9129 0.051 Uiso 1 1 calc R . .
C10 C 0.8091(4) 1.2795(2) 0.8661(3) 0.0405(11) Uani 1 1 d . . .
H10 H 0.7934 1.3298 0.8709 0.049 Uiso 1 1 calc R . .
C11 C 0.9036(4) 1.2572(2) 0.8342(3) 0.0452(12) Uani 1 1 d . . .
H11 H 0.9535 1.2925 0.8173 0.054 Uiso 1 1 calc R . .
C12 C 0.9272(4) 1.1844(2) 0.8264(3) 0.0337(10) Uani 1 1 d . . .
H12 H 0.9919 1.1702 0.8029 0.040 Uiso 1 1 calc R . .
C13 C 0.9750(3) 1.0183(2) 0.7734(3) 0.0245(9) Uani 1 1 d . . .
C14 C 1.0807(4) 0.9811(2) 0.7960(3) 0.0354(10) Uani 1 1 d . . .
H14 H 1.1124 0.9691 0.8561 0.042 Uiso 1 1 calc R . .
C15 C 1.1395(4) 0.9616(2) 0.7319(3) 0.0428(11) Uani 1 1 d . . .
H15 H 1.2118 0.9365 0.7482 0.051 Uiso 1 1 calc R . .
C16 C 1.0943(4) 0.9780(2) 0.6446(3) 0.0409(11) Uani 1 1 d . . .
H16 H 1.1350 0.9644 0.6005 0.049 Uiso 1 1 calc R . .
C17 C 0.9899(4) 1.0144(2) 0.6216(3) 0.0386(11) Uani 1 1 d . . .
H17 H 0.9578 1.0253 0.5612 0.046 Uiso 1 1 calc R . .
C18 C 0.9310(4) 1.0354(2) 0.6859(3) 0.0320(10) Uani 1 1 d . . .
H18 H 0.8600 1.0618 0.6694 0.038 Uiso 1 1 calc R . .
C19 C 0.8710(4) 0.8323(2) 0.9254(2) 0.0276(9) Uani 1 1 d . . .
C20 C 0.7851(4) 0.7790(2) 0.9042(3) 0.0375(11) Uani 1 1 d . . .
H20 H 0.7078 0.7893 0.9097 0.045 Uiso 1 1 calc R . .
C21 C 0.8111(5) 0.7115(2) 0.8753(3) 0.0517(13) Uani 1 1 d . . .
H21 H 0.7515 0.6760 0.8591 0.062 Uiso 1 1 calc R . .
C22 C 0.9234(6) 0.6960(3) 0.8701(4) 0.0703(18) Uani 1 1 d . . .
H22 H 0.9417 0.6492 0.8511 0.084 Uiso 1 1 calc R . .
C23 C 1.0091(5) 0.7468(3) 0.8919(4) 0.0658(17) Uani 1 1 d . . .
H23 H 1.0867 0.7352 0.8882 0.079 Uiso 1 1 calc R . .
C24 C 0.9834(4) 0.8160(2) 0.9197(3) 0.0458(12) Uani 1 1 d . . .
H24 H 1.0432 0.8515 0.9345 0.055 Uiso 1 1 calc R . .
C25 C 0.7396(3) 0.9147(2) 1.0293(2) 0.0248(8) Uani 1 1 d . . .
C26 C 0.6657(4) 0.9719(2) 1.0372(3) 0.0367(10) Uani 1 1 d . . .
H26 H 0.6628 1.0135 1.0004 0.044 Uiso 1 1 calc R . .
C27 C 0.5956(4) 0.9685(3) 1.0990(3) 0.0472(12) Uani 1 1 d . . .
H27 H 0.5459 1.0082 1.1047 0.057 Uiso 1 1 calc R . .
C28 C 0.5979(4) 0.9086(3) 1.1513(3) 0.0500(13) Uani 1 1 d . . .
H28 H 0.5487 0.9062 1.1924 0.060 Uiso 1 1 calc R . .
C29 C 0.6715(4) 0.8515(3) 1.1445(3) 0.0539(14) Uani 1 1 d . . .
H29 H 0.6735 0.8100 1.1812 0.065 Uiso 1 1 calc R . .
C30 C 0.7429(4) 0.8548(2) 1.0838(3) 0.0378(11) Uani 1 1 d . . .
H30 H 0.7942 0.8157 1.0798 0.045 Uiso 1 1 calc R . .
C31 C 0.6463(5) 1.2328(3) 0.6401(4) 0.0704(17) Uani 1 1 d . . .
H31A H 0.6460 1.1980 0.5913 0.085 Uiso 1 1 calc R . .
H31B H 0.7179 1.2243 0.6863 0.085 Uiso 1 1 calc R . .
C32 C 0.2349(4) 1.1164(3) 0.4251(3) 0.0602(14) Uani 1 1 d . . .
H32A H 0.1795 1.1298 0.4623 0.072 Uiso 1 1 calc R . .
H32B H 0.2352 1.0628 0.4201 0.072 Uiso 1 1 calc R . .
N1 N 0.4775(3) 0.9505(2) 0.6587(2) 0.0337(8) Uani 1 1 d . . .
Cl1 Cl 0.29465(9) 0.91290(6) 0.49383(7) 0.0366(3) Uani 1 1 d . . .
Cl2 Cl 0.6481(2) 1.32232(10) 0.59954(14) 0.1223(9) Uani 1 1 d . . .
Cl3 Cl 0.52507(13) 1.21759(8) 0.68413(10) 0.0675(4) Uani 1 1 d . . .
Cl4 Cl 0.37447(13) 1.14629(9) 0.47622(11) 0.0825(5) Uani 1 1 d . . .
Cl5 Cl 0.18743(12) 1.15440(8) 0.31932(9) 0.0621(4) Uani 1 1 d . . .
H1N H 0.422(4) 0.942(2) 0.612(3) 0.044(14) Uiso 1 1 d . . .

loop_
_atom_site_aniso_label
_atom_site_aniso_U_11
_atom_site_aniso_U_22
_atom_site_aniso_U_33
_atom_site_aniso_U_23
_atom_site_aniso_U_13
_atom_site_aniso_U_12
Pd1 0.0238(2) 0.0243(2) 0.0163(2) 0.00084(18) 0.00302(17) 0.00009(18)
P1 0.0249(5) 0.0252(5) 0.0162(5) 0.0008(4) 0.0022(4) 0.0008(4)
P2 0.0241(5) 0.0250(5) 0.0192(5) 0.0006(4) 0.0042(4) 0.0000(4)
C1 0.026(2) 0.0245(19) 0.022(2) 0.0023(16) 0.0062(18) -0.0014(16)
C2 0.027(2) 0.0259(19) 0.019(2) -0.0006(16) 0.0064(17) 0.0017(17)
C3 0.030(2) 0.033(2) 0.024(2) 0.0047(18) 0.0052(19) 0.0004(18)
C4 0.030(2) 0.036(2) 0.031(3) 0.002(2) 0.008(2) -0.0050(18)
C5 0.032(2) 0.037(2) 0.024(2) 0.0051(19) 0.0025(19) 0.001(2)
C6 0.031(2) 0.034(2) 0.020(2) 0.0020(17) 0.0016(18) -0.0025(17)
C7 0.029(2) 0.030(2) 0.016(2) -0.0016(16) 0.0037(17) 0.0006(17)
C8 0.040(2) 0.031(2) 0.031(2) 0.0038(19) 0.012(2) 0.0033(19)
C9 0.053(3) 0.038(3) 0.041(3) 0.005(2) 0.020(2) 0.013(2)
C10 0.052(3) 0.029(2) 0.041(3) 0.001(2) 0.010(2) 0.006(2)
C11 0.042(3) 0.034(2) 0.060(3) 0.010(2) 0.011(3) -0.006(2)
C12 0.036(2) 0.032(2) 0.034(2) 0.0032(19) 0.008(2) -0.0001(19)
C13 0.025(2) 0.027(2) 0.021(2) -0.0018(16) 0.0046(17) -0.0046(16)
C14 0.038(3) 0.043(2) 0.024(2) -0.0033(19) 0.006(2) 0.003(2)
C15 0.037(3) 0.053(3) 0.039(3) -0.007(2) 0.010(2) 0.012(2)
C16 0.052(3) 0.047(3) 0.027(3) -0.007(2) 0.017(2) 0.000(2)
C17 0.046(3) 0.051(3) 0.019(2) -0.0002(19) 0.009(2) 0.002(2)
C18 0.034(2) 0.038(2) 0.024(2) 0.0044(19) 0.0072(19) 0.0014(19)
C19 0.039(2) 0.026(2) 0.018(2) 0.0026(17) 0.0076(19) 0.0067(18)
C20 0.046(3) 0.030(2) 0.035(3) 0.001(2) 0.005(2) -0.002(2)
C21 0.080(4) 0.031(2) 0.048(3) -0.007(2) 0.024(3) -0.005(3)
C22 0.116(5) 0.035(3) 0.076(4) 0.000(3) 0.055(4) 0.007(3)
C23 0.074(4) 0.055(3) 0.084(4) 0.002(3) 0.050(4) 0.021(3)
C24 0.051(3) 0.044(3) 0.049(3) 0.003(2) 0.026(3) 0.006(2)
C25 0.023(2) 0.032(2) 0.018(2) 0.0002(17) 0.0006(17) -0.0048(17)
C26 0.041(3) 0.038(2) 0.033(3) 0.002(2) 0.011(2) 0.002(2)
C27 0.046(3) 0.057(3) 0.042(3) -0.003(3) 0.018(2) 0.013(2)
C28 0.046(3) 0.073(4) 0.038(3) 0.010(3) 0.025(2) 0.005(3)
C29 0.066(4) 0.057(3) 0.045(3) 0.018(3) 0.028(3) 0.000(3)
C30 0.042(3) 0.042(3) 0.032(3) 0.008(2) 0.015(2) 0.008(2)
C31 0.068(4) 0.065(4) 0.078(4) -0.028(3) 0.016(3) 0.008(3)
C32 0.055(3) 0.075(4) 0.048(3) -0.015(3) 0.007(3) 0.010(3)
N1 0.0240(19) 0.047(2) 0.026(2) -0.0027(18) -0.0018(17) -0.0032(17)
Cl1 0.0349(6) 0.0476(6) 0.0253(6) 0.0007(5) 0.0021(5) -0.0025(5)
Cl2 0.217(3) 0.0707(11) 0.1150(16) 0.0003(11) 0.1130(18) 0.0163(13)
Cl3 0.0644(9) 0.0593(8) 0.0708(10) -0.0054(7) -0.0023(8) 0.0008(7)
Cl4 0.0617(9) 0.0886(11) 0.0843(12) -0.0343(9) -0.0116(9) 0.0080(8)
Cl5 0.0595(8) 0.0715(9) 0.0534(8) -0.0112(7) 0.0081(7) 0.0109(7)

_geom_special_details            
; 
 All esds (except the esd in the dihedral angle between two l.s. planes) 
 are estimated using the full covariance matrix.  The cell esds are taken 
 into account individually in the estimation of esds in distances, angles 
 and torsion angles; correlations between esds in cell parameters are only 
 used when they are defined by crystal symmetry.  An approximate (isotropic) 
 treatment of cell esds is used for estimating esds involving l.s. planes. 
;

loop_
_geom_bond_atom_site_label_1
_geom_bond_atom_site_label_2
_geom_bond_distance
_geom_bond_site_symmetry_2
_geom_bond_publ_flag
Pd1 P1 2.3092(10) 3_777 ?
Pd1 P1 2.3093(10) . ?
Pd1 P2 2.3247(10) 3_777 ?
Pd1 P2 2.3247(10) . ?
P1 C1 1.775(4) . ?
P1 C7 1.808(4) . ?
P1 C13 1.825(4) . ?
P2 C1 1.772(4) . ?
P2 C19 1.821(4) . ?
P2 C25 1.823(4) . ?
C1 C2 1.415(5) . ?
C2 C6 1.413(5) . ?
C2 C3 1.429(5) . ?
C3 C4 1.351(6) . ?
C3 H3 0.9500 . ?
C4 N1 1.349(5) . ?
C4 H4 0.9500 . ?
C5 N1 1.351(5) . ?
C5 C6 1.365(6) . ?
C5 H5 0.9500 . ?
C6 H6 0.9500 . ?
C7 C12 1.382(5) . ?
C7 C8 1.400(5) . ?
C8 C9 1.378(6) . ?
C8 H8 0.9500 . ?
C9 C10 1.377(6) . ?
C9 H9 0.9500 . ?
C10 C11 1.373(6) . ?
C10 H10 0.9500 . ?
C11 C12 1.378(6) . ?
C11 H11 0.9500 . ?
C12 H12 0.9500 . ?
C13 C18 1.377(5) . ?
C13 C14 1.393(6) . ?
C14 C15 1.376(5) . ?
C14 H14 0.9500 . ?
C15 C16 1.373(6) . ?
C15 H15 0.9500 . ?
C16 C17 1.374(6) . ?
C16 H16 0.9500 . ?
C17 C18 1.387(5) . ?
C17 H17 0.9500 . ?
C18 H18 0.9500 . ?
C19 C24 1.377(6) . ?
C19 C20 1.394(6) . ?
C20 C21 1.375(6) . ?
C20 H20 0.9500 . ?
C21 C22 1.370(7) . ?
C21 H21 0.9500 . ?
C22 C23 1.361(8) . ?
C22 H22 0.9500 . ?
C23 C24 1.397(6) . ?
C23 H23 0.9500 . ?
C24 H24 0.9500 . ?
C25 C30 1.384(5) . ?
C25 C26 1.387(5) . ?
C26 C27 1.395(6) . ?
C26 H26 0.9500 . ?
C27 C28 1.366(7) . ?
C27 H27 0.9500 . ?
C28 C29 1.378(6) . ?
C28 H28 0.9500 . ?
C29 C30 1.392(6) . ?
C29 H29 0.9500 . ?
C30 H30 0.9500 . ?
C31 Cl3 1.732(6) . ?
C31 Cl2 1.764(6) . ?
C31 H31A 0.9900 . ?
C31 H31B 0.9900 . ?
C32 Cl4 1.745(5) . ?
C32 Cl5 1.756(6) . ?
C32 H32A 0.9900 . ?
C32 H32B 0.9900 . ?
N1 H1N 0.88(5) . ?

loop_
_geom_angle_atom_site_label_1
_geom_angle_atom_site_label_2
_geom_angle_atom_site_label_3
_geom_angle
_geom_angle_site_symmetry_1
_geom_angle_site_symmetry_3
_geom_angle_publ_flag
P1 Pd1 P1 180.00(3) 3_777 . ?
P1 Pd1 P2 71.38(3) 3_777 3_777 ?
P1 Pd1 P2 108.62(3) . 3_777 ?
P1 Pd1 P2 108.62(3) 3_777 . ?
P1 Pd1 P2 71.38(3) . . ?
P2 Pd1 P2 180.0 3_777 . ?
C1 P1 C7 112.23(17) . . ?
C1 P1 C13 113.77(17) . . ?
C7 P1 C13 107.01(17) . . ?
C1 P1 Pd1 94.03(13) . . ?
C7 P1 Pd1 115.91(13) . . ?
C13 P1 Pd1 113.75(13) . . ?
C1 P2 C19 113.08(18) . . ?
C1 P2 C25 112.13(18) . . ?
C19 P2 C25 105.08(17) . . ?
C1 P2 Pd1 93.58(13) . . ?
C19 P2 Pd1 115.56(14) . . ?
C25 P2 Pd1 117.48(13) . . ?
C2 C1 P2 131.2(3) . . ?
C2 C1 P1 128.5(3) . . ?
P2 C1 P1 99.3(2) . . ?
C6 C2 C1 122.6(4) . . ?
C6 C2 C3 114.5(4) . . ?
C1 C2 C3 122.9(3) . . ?
C4 C3 C2 121.2(4) . . ?
C4 C3 H3 119.4 . . ?
C2 C3 H3 119.4 . . ?
N1 C4 C3 121.6(4) . . ?
N1 C4 H4 119.2 . . ?
C3 C4 H4 119.2 . . ?
N1 C5 C6 120.6(4) . . ?
N1 C5 H5 119.7 . . ?
C6 C5 H5 119.7 . . ?
C5 C6 C2 121.9(4) . . ?
C5 C6 H6 119.1 . . ?
C2 C6 H6 119.1 . . ?
C12 C7 C8 118.1(3) . . ?
C12 C7 P1 121.9(3) . . ?
C8 C7 P1 119.5(3) . . ?
C9 C8 C7 120.9(4) . . ?
C9 C8 H8 119.6 . . ?
C7 C8 H8 119.6 . . ?
C10 C9 C8 120.2(4) . . ?
C10 C9 H9 119.9 . . ?
C8 C9 H9 119.9 . . ?
C11 C10 C9 119.3(4) . . ?
C11 C10 H10 120.4 . . ?
C9 C10 H10 120.4 . . ?
C10 C11 C12 121.1(4) . . ?
C10 C11 H11 119.5 . . ?
C12 C11 H11 119.5 . . ?
C11 C12 C7 120.5(4) . . ?
C11 C12 H12 119.7 . . ?
C7 C12 H12 119.7 . . ?
C18 C13 C14 118.6(3) . . ?
C18 C13 P1 123.8(3) . . ?
C14 C13 P1 117.5(3) . . ?
C15 C14 C13 120.6(4) . . ?
C15 C14 H14 119.7 . . ?
C13 C14 H14 119.7 . . ?
C16 C15 C14 120.4(4) . . ?
C16 C15 H15 119.8 . . ?
C14 C15 H15 119.8 . . ?
C15 C16 C17 119.5(4) . . ?
C15 C16 H16 120.2 . . ?
C17 C16 H16 120.2 . . ?
C16 C17 C18 120.5(4) . . ?
C16 C17 H17 119.7 . . ?
C18 C17 H17 119.7 . . ?
C13 C18 C17 120.3(4) . . ?
C13 C18 H18 119.8 . . ?
C17 C18 H18 119.8 . . ?
C24 C19 C20 119.0(4) . . ?
C24 C19 P2 118.3(3) . . ?
C20 C19 P2 122.5(3) . . ?
C21 C20 C19 120.7(4) . . ?
C21 C20 H20 119.6 . . ?
C19 C20 H20 119.6 . . ?
C22 C21 C20 119.5(5) . . ?
C22 C21 H21 120.2 . . ?
C20 C21 H21 120.2 . . ?
C23 C22 C21 120.8(5) . . ?
C23 C22 H22 119.6 . . ?
C21 C22 H22 119.6 . . ?
C22 C23 C24 120.3(5) . . ?
C22 C23 H23 119.9 . . ?
C24 C23 H23 119.9 . . ?
C19 C24 C23 119.6(5) . . ?
C19 C24 H24 120.2 . . ?
C23 C24 H24 120.2 . . ?
C30 C25 C26 119.0(3) . . ?
C30 C25 P2 122.1(3) . . ?
C26 C25 P2 118.6(3) . . ?
C25 C26 C27 120.1(4) . . ?
C25 C26 H26 119.9 . . ?
C27 C26 H26 119.9 . . ?
C28 C27 C26 120.4(4) . . ?
C28 C27 H27 119.8 . . ?
C26 C27 H27 119.8 . . ?
C27 C28 C29 120.0(4) . . ?
C27 C28 H28 120.0 . . ?
C29 C28 H28 120.0 . . ?
C28 C29 C30 120.0(4) . . ?
C28 C29 H29 120.0 . . ?
C30 C29 H29 120.0 . . ?
C25 C30 C29 120.4(4) . . ?
C25 C30 H30 119.8 . . ?
C29 C30 H30 119.8 . . ?
Cl3 C31 Cl2 111.5(3) . . ?
Cl3 C31 H31A 109.3 . . ?
Cl2 C31 H31A 109.3 . . ?
Cl3 C31 H31B 109.3 . . ?
Cl2 C31 H31B 109.3 . . ?
H31A C31 H31B 108.0 . . ?
Cl4 C32 Cl5 111.8(3) . . ?
Cl4 C32 H32A 109.3 . . ?
Cl5 C32 H32A 109.3 . . ?
Cl4 C32 H32B 109.3 . . ?
Cl5 C32 H32B 109.3 . . ?
H32A C32 H32B 107.9 . . ?
C4 N1 C5 120.0(4) . . ?
C4 N1 H1N 122(3) . . ?
C5 N1 H1N 117(3) . . ?

_diffrn_measured_fraction_theta_max 0.996
_diffrn_reflns_theta_full        27.11
_diffrn_measured_fraction_theta_full 0.996
_refine_diff_density_max         1.084
_refine_diff_density_min         -0.919
_refine_diff_density_rms         0.103
